# Supplementary material for: Low-dose Actinomycin-D treatment re-establishes the tumoursuppressive function of P53 in RELA-positive ependymoma
Source: PubMed Central journal article supplement (PMC5308696; doi:10.18632/oncotarget.11452), 2016-08-20
Supplement: oncotarget-07-61860-s001.pdf [file oncotarget-07-61860-s001.pdf]

## Low-dose Actinomycin-D treatment re-establishes the tumour-suppressive function of P53 in *RELA*-positive ependymoma

### Supplementary Materials

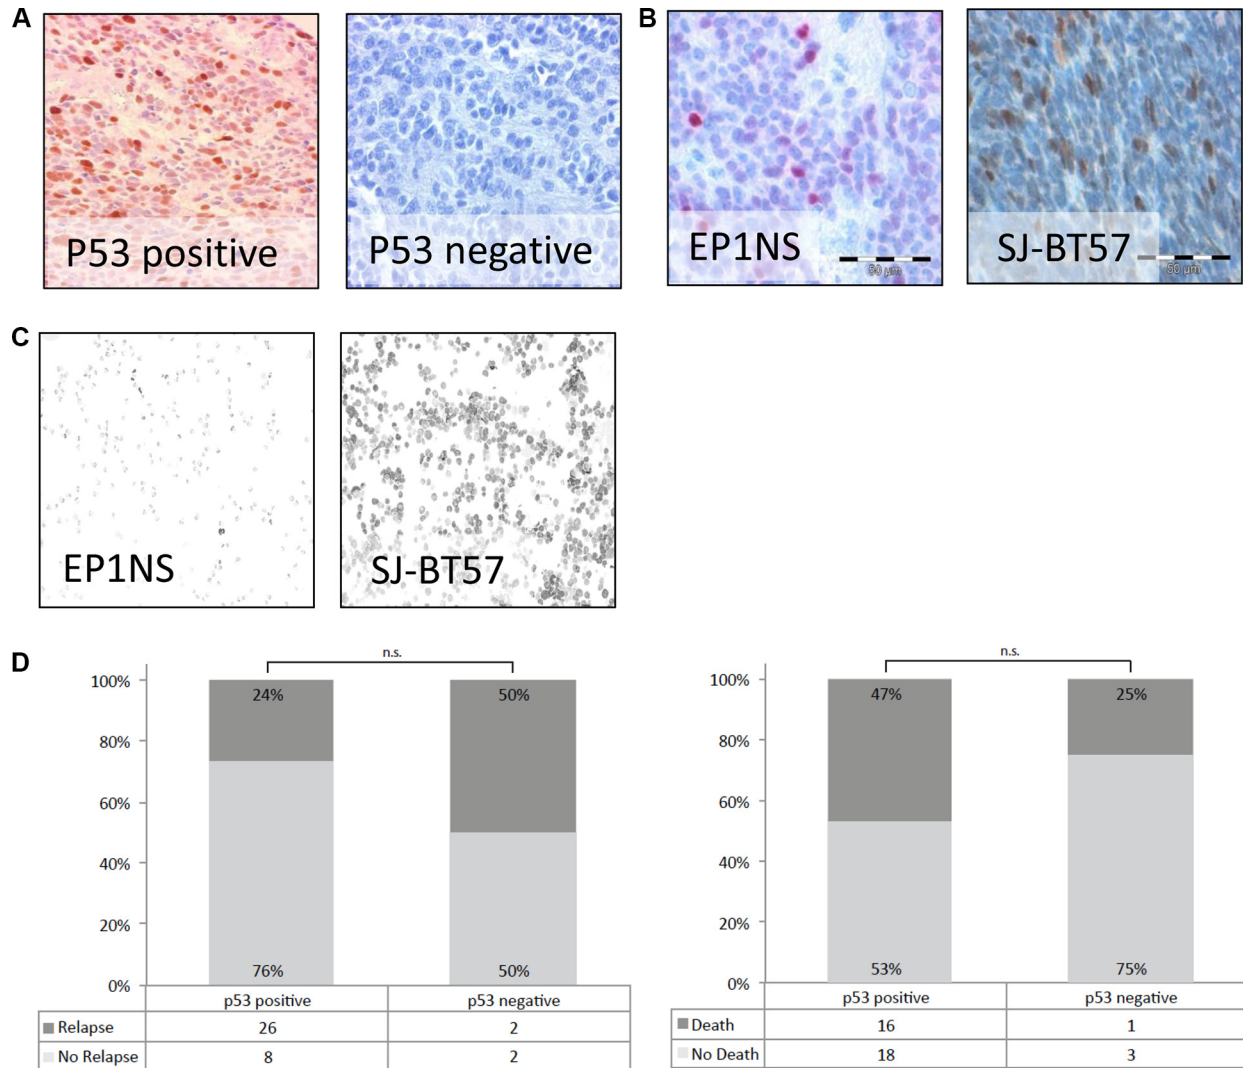

**Supplementary Figure S1:** (A) Representative pictures of a p53 positive and a p53 negative primary ependymoma after IHC staining. (B) Representative pictures of p53 IHC performed on mouse brain sections after orthotopical transplantation of EP1NS and SJ-BT57 cells in the posterior fossa. The EP1NS mouse tumours exhibit a moderate p53 staining, whereas SJ-BT57 tumours show a stronger p53 accumulation. (C) Immunohistochemistry of p53 *in vitro* of EP1NS (left) and SJ-BT57 (right) cells showing a strong p53 accumulation in SJ-BT57 and a moderate p53 signal in EP1NS cells. (D) Supratentorial *RELA*-positive ependymoma ( $n = 38$ ; TMA cohort) show no significant association between p53 IHC positivity and relapse (left;  $P = 0.29$ ) or mortality (right;  $P = 0.61$ ) using Fisher's exact test.

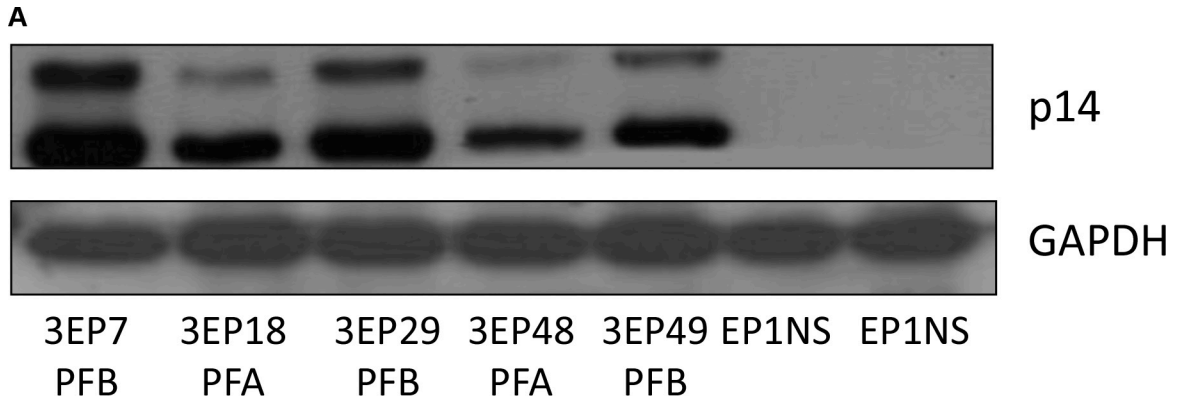

**Supplementary Figure S2: Protein analysis of primary ependymomas (PF-EPN-A and PF-EPN-B) and two samples of the EP1NS cells (duplicate) showing the absence of p14 in the EP1NS cells underlining the homozygous *CDKN2A* loss in the EP1NS (ST-EPN-RELA) cell line.**

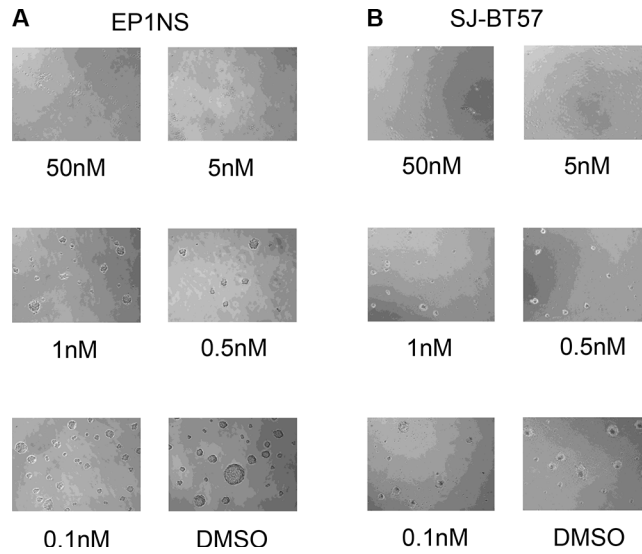

**Supplementary Figure S3: Microscopic pictures of the EP1NS (A) and SJ-BT57 (B) cells after 96 hours Actinomycin-D treatment at different concentrations as labelled and the DMSO control showing the disruption of neurospheres after low- and high-dose treatment.**

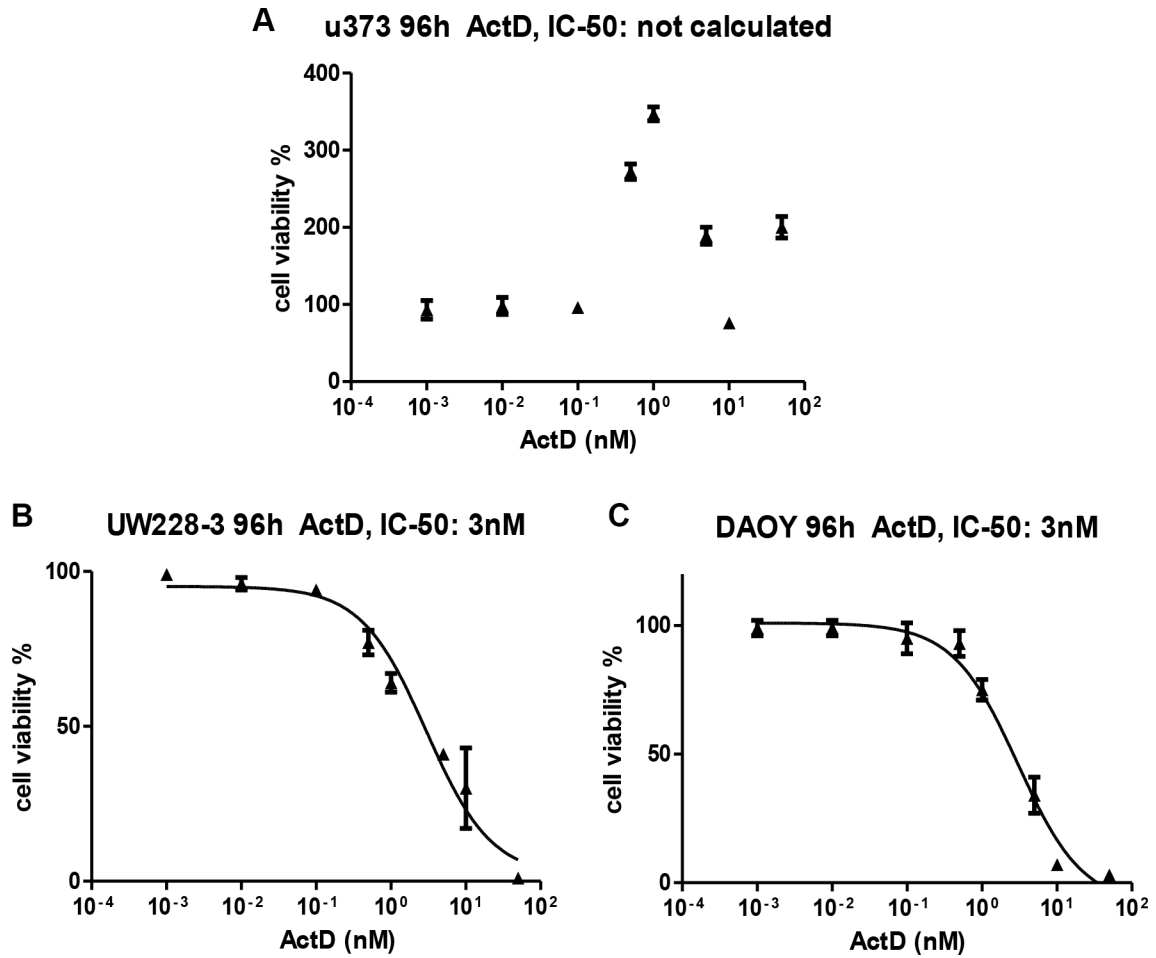

Supplementary Figure S4: MTS cell viability assay of 96 hours Actinomycin-D treatment of different cell lines of glioblastoma (A) and medulloblastoma (B, C) cells. ActD, Actinomycin-D; IC, Inhibitory Concentration.

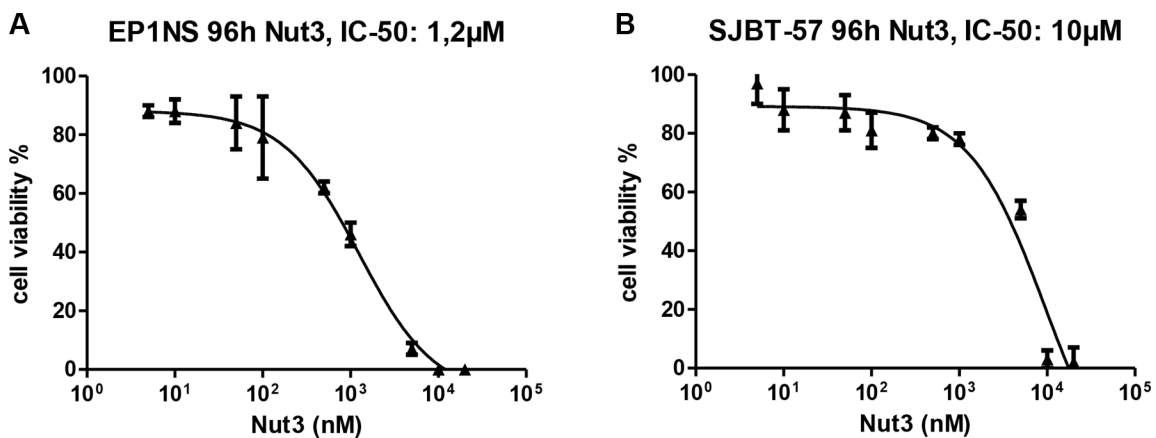

Supplementary Figure S5: MTS cell viability assay of EP1NS (A) and SJ-BT57 (B) ependymoma cell lines after 96 hours treatment with different concentrations of Nutlin-3 showing an IC-50 of 1.2  $\mu$ M for the EP1NS and a 8.3-fold higher IC-50 for the SJ-BT57 cells.

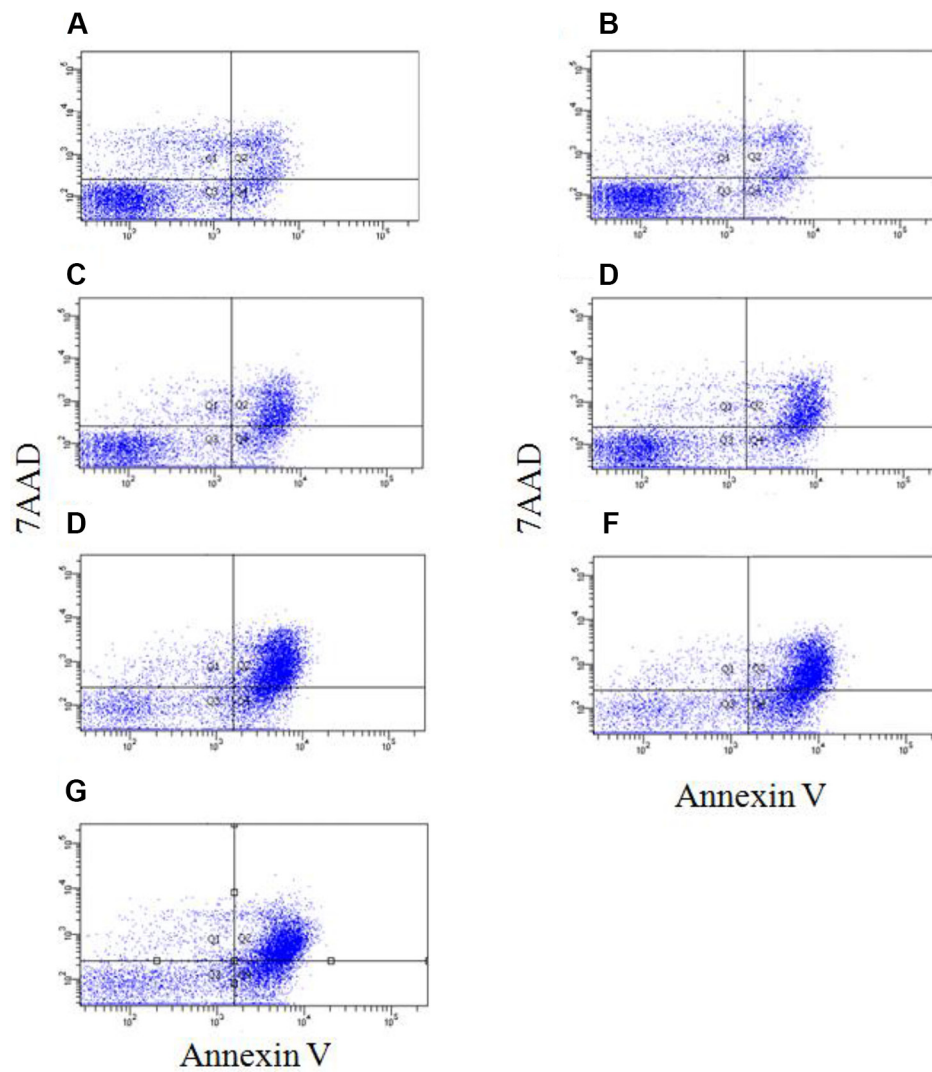

**Supplementary Figure S6: Flow cytometric analysis with 7AAD and Annexin V staining of Actinomycin-D treated SJ-BT57 cells for 48 hours.** The diagrams represent the DMSO control (A) as well as different concentrations of the agent including 0.1 nM (B), 0.5 nM (C), 1 nM (D), 5 nM (E), 10 nM (F) and 100 nM (G).

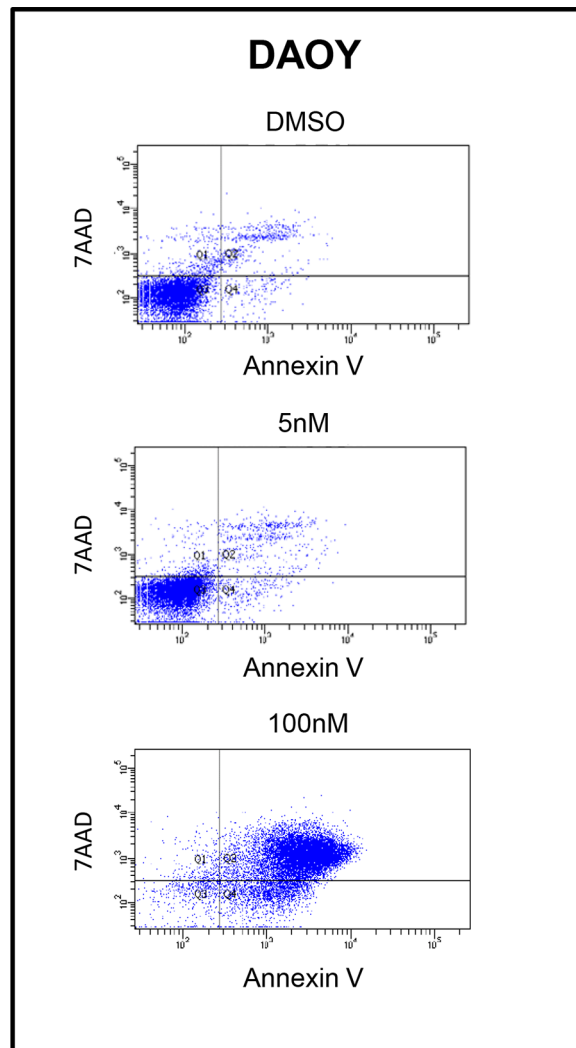

**Supplementary Figure S7: FACS analysis of low-dose (5 nM) and high-dose treatment of the DAOY cells demonstrating apoptosis only after high-dose treatment of the cells.**

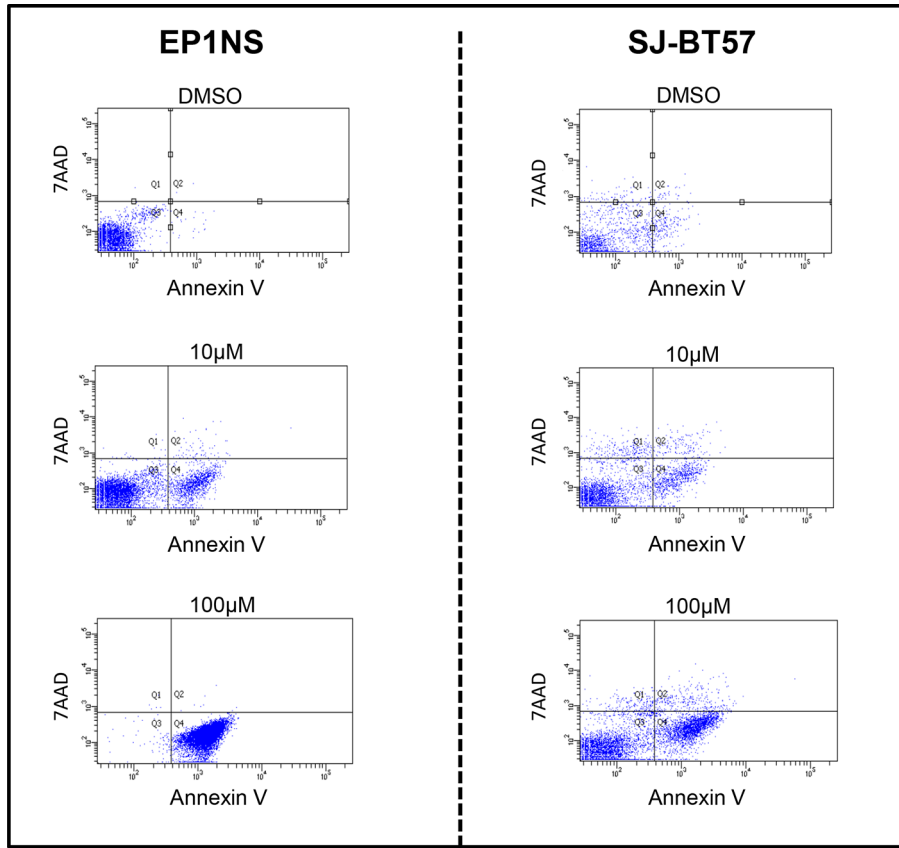

**Supplementary Figure S8: Flow cytometric analysis after 7AAD and Annexin V staining of EP1NS (left panel) and SJ-BT57 (right panel) cells following 48 hours treatment with Nutlin-3.** Illustrated are the DMSO controls, 10 μM and 100 μM Nutlin-3 treatments of the SJ-BT57 and EP1NS cells respectively.

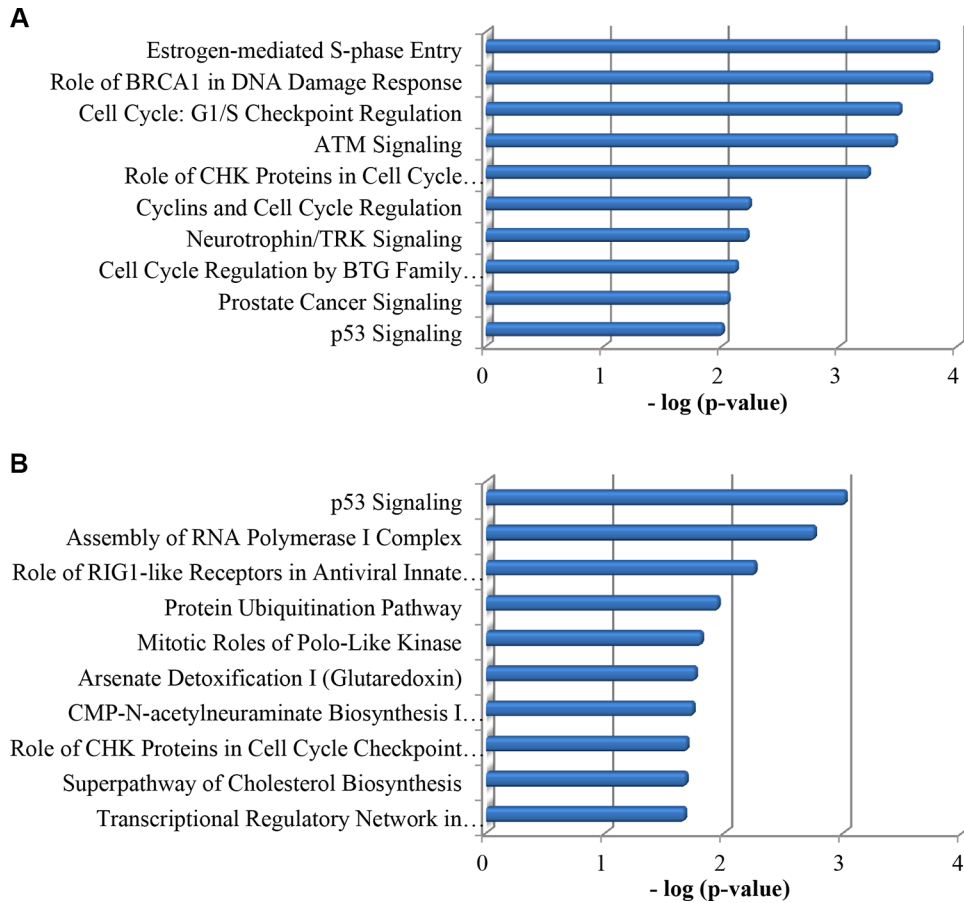

**Supplementary Figure S9: Ingenuity pathway analysis of significant differentially regulated genes between high-dose (100 nM) and low-dose (5 nM) Actinomycin-D conducted separately for both cell lines, (A) SJ-BT57 and (B) EP1NS. The p53 pathway proved to be the top upregulated pathway after low-dose treatment with the cytostatic agent in the EP1NS cells.**

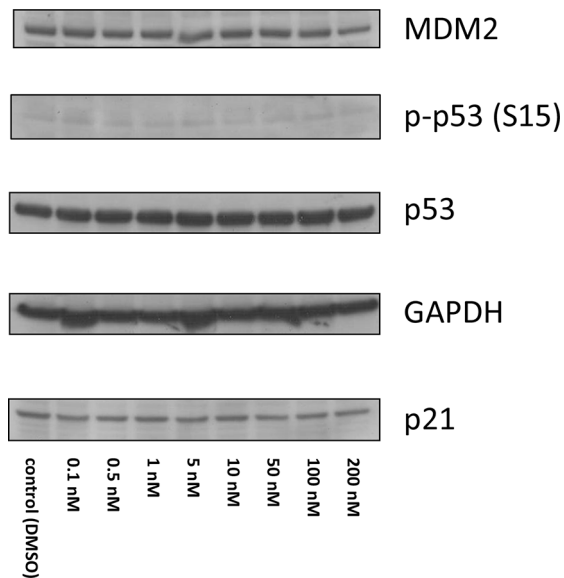

**Supplementary Figure S10: Protein analysis of DAOY medulloblastoma cells after 6 hours treatment with Actinomycin-D confirming the absence of upregulation of p53-related genes and demonstrating constant levels of p53 in a TP53 mutated cell line.**

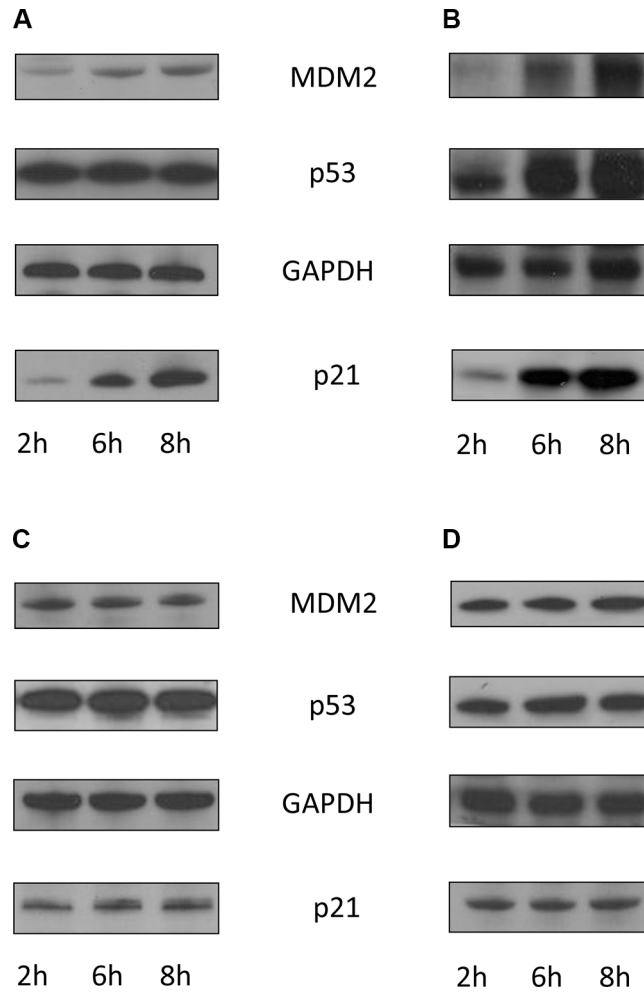

**Supplementary Figure S11: Western blot analysis of 5 nM Actinomycin-D treated SJ-BT57 (A) and EP1NS (B) cells for 2 hours, 6 hours and 8 hours as well as their respective DMSO controls of SJ-BT57 (C) and EP1NS (D) cells indicating time-dependent upregulation of p53-associated partners after exposure of the cells to 5nM Actinomycin-D, while no difference is observed after DMSO treatment.**

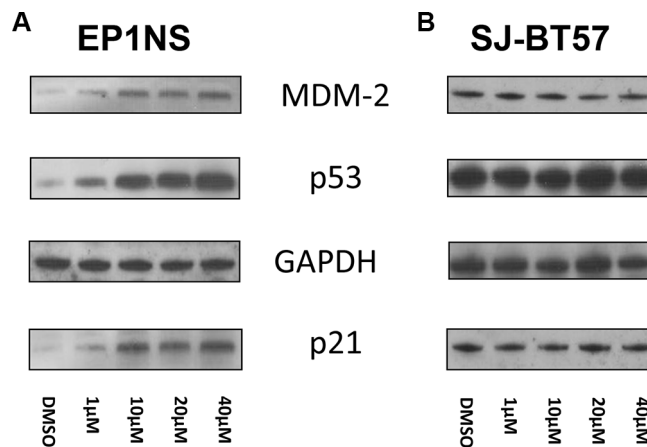

**Supplementary Figure S12: Protein analysis of ependymoma cells after 6 hours treatment with Nutlin-3 showing a dose-dependent response upon the agent in the EP1NS, yet no effect in the SJ-BT57 cells.**



**Supplementary Table S1: p53 mutation in 130 primary tumors (4/130 = 3%)**

| Patient | mutation        | exon | AA change | Exon number | Genomic description | CpG site | Splice site | WT base | WT codon | Mutant codon | Effect   | location       |
|---------|-----------------|------|-----------|-------------|---------------------|----------|-------------|---------|----------|--------------|----------|----------------|
| EPN-005 | g.del11045/46CT | 2    | –         | 2-exon      | g.del11045/46CT     | no       | no          | –       | –        | –            | –        | supratentorial |
| EPN-026 | c.447C > T      | 5    | p.S149S   | 5-exon      | g.12435C > T        | no       | no          | C       | TCC      | TCT          | silent   | infratentorial |
| EPN-031 | c.509C > T      | 5    | p.T170M   | 5-exon      | g.12497C > T        | yes      | no          | C       | ACG      | ATG          | missense | infratentorial |
| EPN-030 | c.743G > A      | 7    | p.R248Q   | 7-exon      | g.13380G > A        | yes      | no          | G       | CGG      | CAG          | missense | supratentorial |

**Supplementary Table S2: p53-associated differentially regulated genes in both cell lines (EP1NS, SJ-BT57) including the fold change value of low- versus high-dose Actinomycin-D treatment**

| Both cell lines   |             | SJ-BT57        |             | EP1NS            |             |
|-------------------|-------------|----------------|-------------|------------------|-------------|
| Molecular Subtype |             | PF-EPN-A       |             | ST-EPN-RELA      |             |
| Gene              | Fold change | Gene           | Fold change | Gene             | Fold change |
| <i>MDM2</i>       | 6.239       | <i>GADD45G</i> | 5.864       | <i>PUMA</i>      | 19.263      |
| <i>PUMA</i>       | 5.916       | <i>JMY</i>     | 5.838       | <i>PIK3R1</i>    | 16.355      |
| <i>PIK3R1</i>     | 5.524       | <i>PML</i>     | 5.663       | <i>GADD45A</i>   | 12.124      |
| <i>PIK3R3</i>     | 4.557       | <i>MDM2</i>    | 5.118       | <i>FAS</i>       | 9.713       |
| <i>SIRT1</i>      | 4.173       | <i>TP53BP2</i> | 4.864       | <i>MDM2</i>      | 8.535       |
| <i>GADD45G</i>    | 4.139       | <i>SIRT1</i>   | 4.133       | <i>PIK3C3</i>    | 8.454       |
| <i>PIK3C3</i>     | 4.125       | <i>PIK3R4</i>  | 3.948       | <i>TP53INP1</i>  | 7.043       |
| <i>GADD45A</i>    | 4.112       | <i>MAPK14</i>  | 3.894       | <i>CCNG1</i>     | 6.426       |
| <i>TP53BP2</i>    | 4.025       | <i>PIK3R1</i>  | 3.283       | <i>PML</i>       | 6.044       |
| <i>JMY</i>        | 3.897       | <i>CHEK1</i>   | 3.262       | <i>PIK3R3</i>    | 5.588       |
| <i>PIK3R4</i>     | 3.785       | <i>PIK3R3</i>  | 3.167       | <i>TP53I3</i>    | 5.45        |
| <i>PTEN</i>       | 3.306       | <i>PTEN</i>    | 3.078       | <i>C12orf5</i>   | 5.127       |
| <i>TP53I3</i>     | 3.232       | <i>PIK3C3</i>  | 2.926       | <i>TNFRSF10B</i> | 4.976       |
| <i>PML</i>        | 3.091       | <i>GNL3</i>    | 2.749       | <i>DRAM1</i>     | 4.455       |
| <i>MAPK14</i>     | 3.075       | <i>PUMA</i>    | 2.596       | <i>CDKN1A</i>    | 4.28        |
| <i>GNL3</i>       | 3.062       | <i>SNAI2</i>   | 2.157       | <i>PTEN</i>      | 4.251       |
| <i>FAS</i>        | 2.949       | <i>PIK3CB</i>  | 2.049       | <i>SIRT1</i>     | 4.245       |
| <i>C12orf5</i>    | 2.903       | <i>PIAS1</i>   | 2.015       | <i>TNFRSF10A</i> | 4.07        |
| <i>DRAM1</i>      | 2.755       |                |             | <i>CSNK1D</i>    | 3.982       |
| <i>SNAI2</i>      | 2.711       |                |             | <i>PCNA</i>      | 3.62        |
| <i>TNFRSF10B</i>  | 2.54        |                |             | <i>GNL3</i>      | 3.495       |
| <i>CHEK1</i>      | 2.469       |                |             | <i>PIK3R4</i>    | 3.49        |
| <i>CSNK1D</i>     | 2.418       |                |             | <i>SNAI2</i>     | 3.278       |
| <i>MED1</i>       | 2.22        |                |             | <i>RRM2B</i>     | 3.275       |
| <i>RRM2B</i>      | 2.207       |                |             | <i>SCO2</i>      | 3.226       |
|                   |             |                |             | <i>GADD45G</i>   | 3.1         |
|                   |             |                |             | <i>ADCK3</i>     | 3.073       |
|                   |             |                |             | <i>JMY</i>       | 3.022       |
|                   |             |                |             | <i>MED1</i>      | 2.997       |
|                   |             |                |             | <i>CCNK</i>      | 2.857       |
|                   |             |                |             | <i>JUN</i>       | 2.743       |
|                   |             |                |             | <i>HIF1A</i>     | 2.558       |
|                   |             |                |             | <i>TP53BP2</i>   | 2.517       |
|                   |             |                |             | <i>PMAIP1</i>    | 2.507       |
|                   |             |                |             | <i>MAPK14</i>    | 2.397       |
|                   |             |                |             | <i>RPRM</i>      | 2.225       |
|                   |             |                |             | <i>PIK3CA</i>    | 2.175       |
